# Supplementary material for: Clinical significance of serum and mesangial galactose-deficient IgA1 in patients with IgA nephropathy
Source: PubMed Central journal article supplement (PMC6214568; doi:10.1371/journal.pone.0206865), 2018-11-02

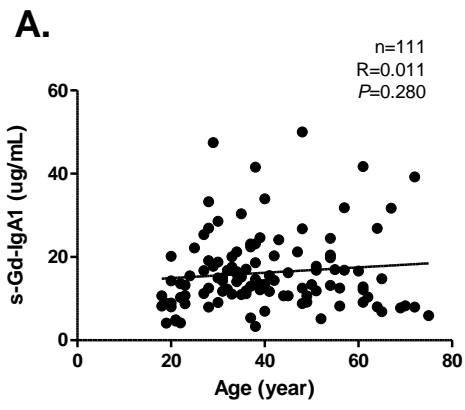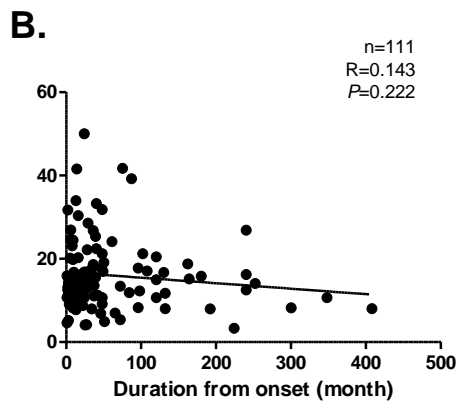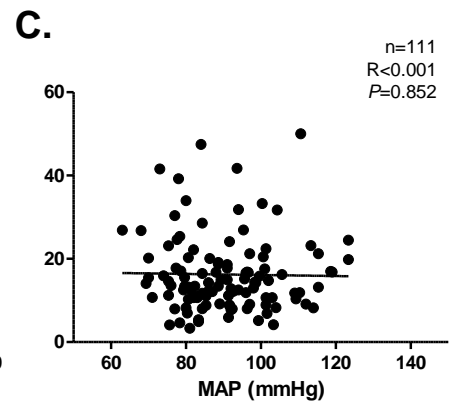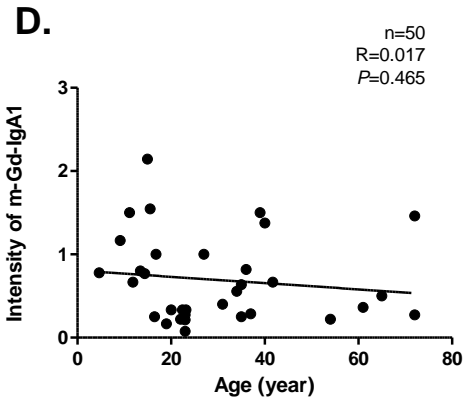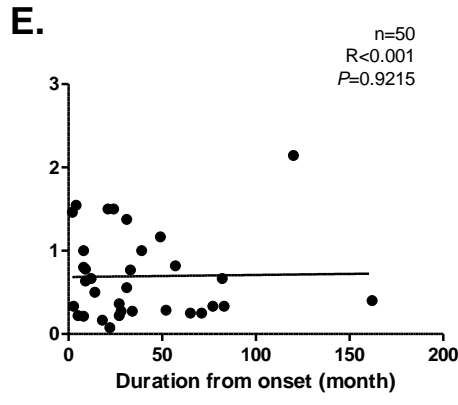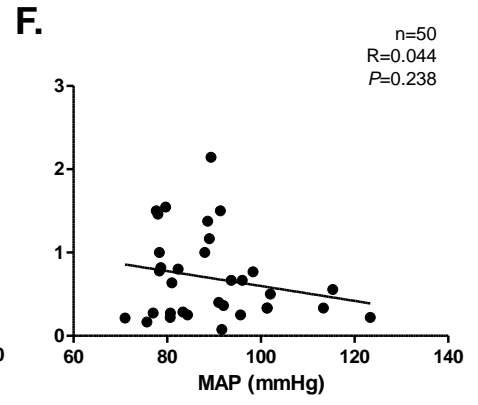

Supplement: pone.0206865.s001.pdf [file pone.0206865.s001.pdf]
