# Supplementary material for: Clinical significance of serum and mesangial galactose-deficient IgA1 in patients with IgA nephropathy
Source: PubMed Central journal article supplement (PMC6214568; doi:10.1371/journal.pone.0206865), 2018-11-02

**HSPN****LN****AAV****MCD****A.****B.****C.****D.**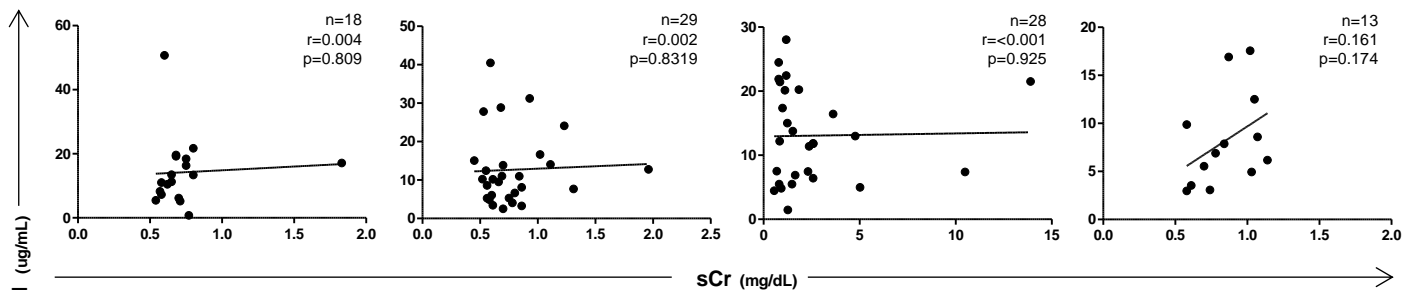**E.****F.****G.****H.**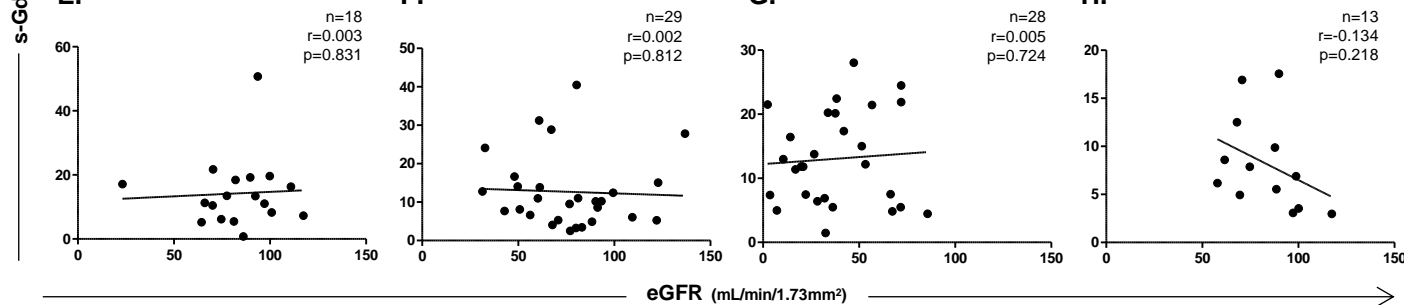

Supplement: pone.0206865.s003.pdf [file pone.0206865.s003.pdf]
