# Supplementary material for: Clinical significance of serum and mesangial galactose-deficient IgA1 in patients with IgA nephropathy
Source: PubMed Central journal article supplement (PMC6214568; doi:10.1371/journal.pone.0206865), 2018-11-02

**IgA deposition****A.**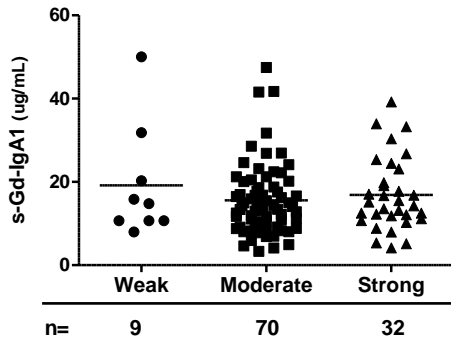**IgG deposition****B.**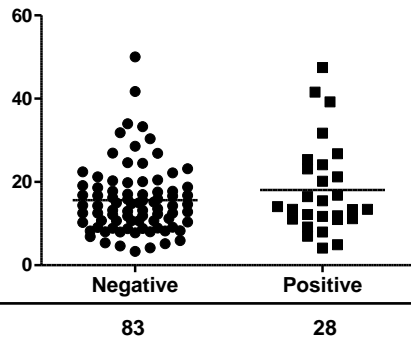**IgM deposition****C.**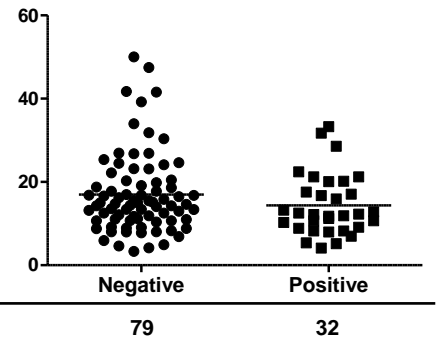**D.**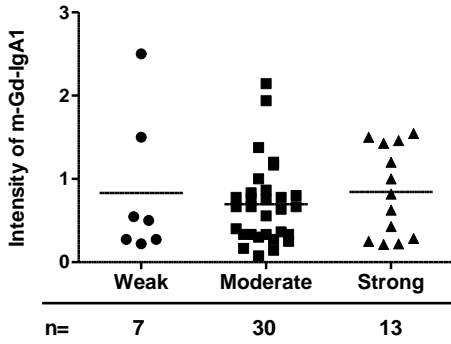**E.**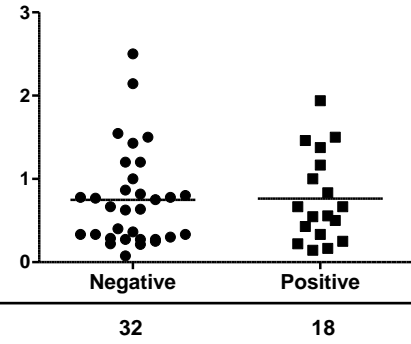**F.**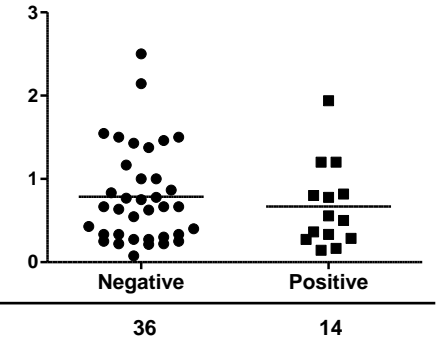

Supplement: pone.0206865.s005.pdf [file pone.0206865.s005.pdf]
